# Supplementary material for: High-energy-density electrochemical flow capacitors containing quinone derivatives impregnated in nanoporous carbon beads
Source: Royal Society of Chemistry journal article supplement (doi:10.1039/c6ta08733g), 2016-12-12
Supplement: c6ta08733g1.pdf [file c6ta08733g1.pdf]

## Supporting Information

### **High-energy-density electrochemical flow capacitors containing quinone derivatives impregnated in nanoporous carbon beads**

Takaaki Tomai\*, Hayate Saito, Itaru Honma

Institute of Multidisciplinary Research for Advanced Materials, Tohoku University, 2-

1-1 Katahira, Sendai, Miyagi 980-8577, Japan.

e-mail: [tomai@tagen.tohoku.ac.jp](mailto:tomai@tagen.tohoku.ac.jp)

### N<sub>2</sub> adsorption isotherm

From the N<sub>2</sub> adsorption/desorption behaviors obtained using an automatic adsorption apparatus (BELSORP-18, BEL Japan, Inc.), Brunauer Emmett Teller (BET) surface area and pore volume were determined. The BET surface area and the pore volume reduced from 3200 m<sup>2</sup> g<sup>-1</sup> to 1820 m<sup>2</sup> g<sup>-1</sup> and from 2.23 cm<sup>3</sup> g<sup>-1</sup> to 1.13 cm<sup>3</sup> g<sup>-1</sup> by the complexation with the DCAQ, and their N<sub>2</sub> adsorption isotherms are shown in Figure S1.

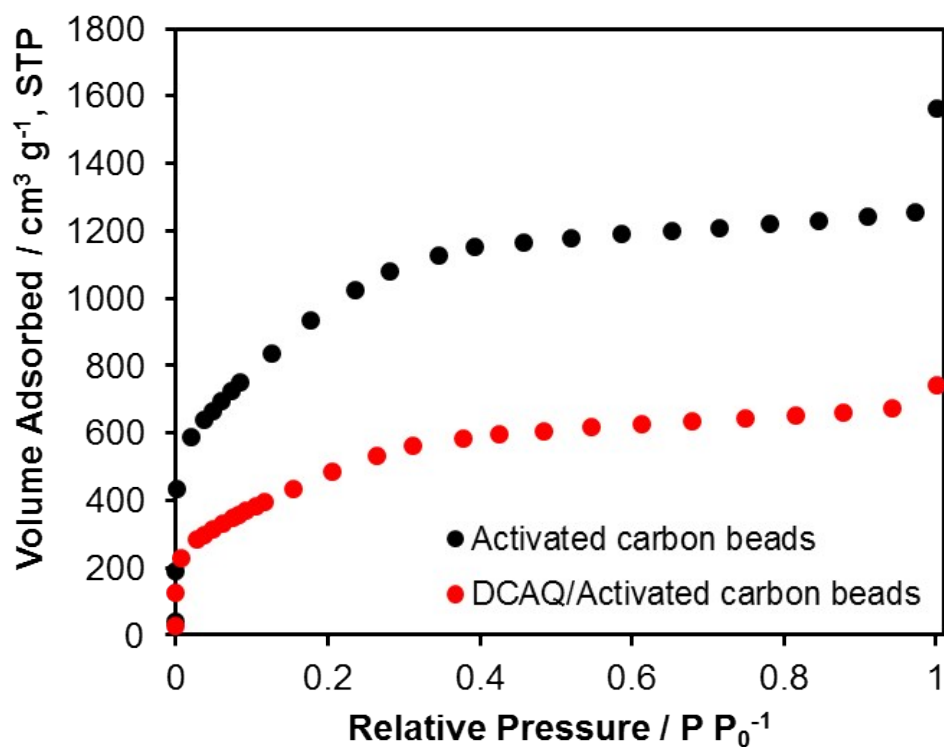

Figure S1 N<sub>2</sub> adsorption isotherms for the nanoporous carbon beads before and after complexation with DCAQ.

### Raman spectroscopy

The Raman spectra for the pristine activated carbon beads, DCAQ, and the DCAQ/carbon complex are shown in Figure S2. The Raman spectra were recorded using a micro-Raman system (HORIBA Scientific, Japan) at room temperature. The powder samples were excited by using Nd:YAG laser (532 nm). The spectrum for the complex has both features of activated carbon beads and DCAQ.

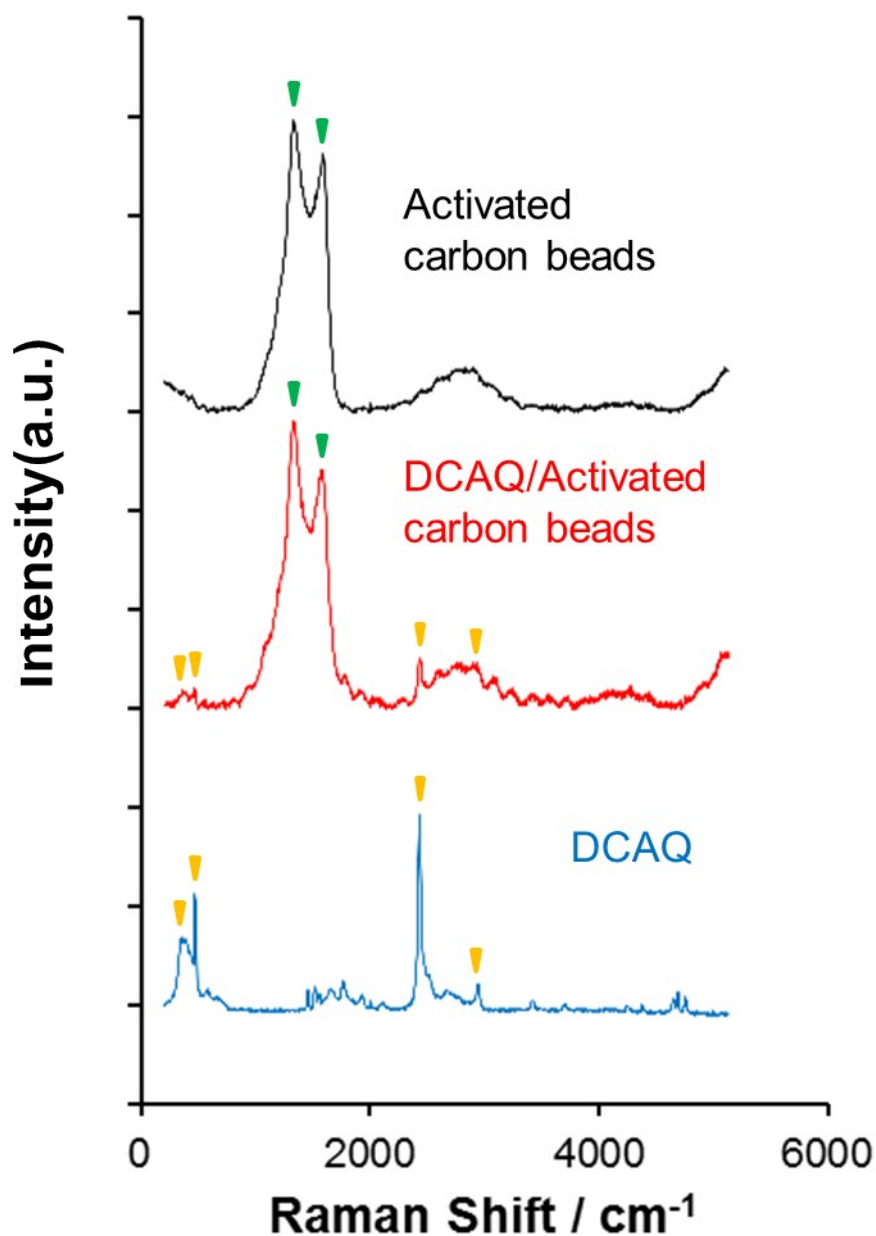

Figure S2 Raman spectra for activated carbon beads, DCAQ/activated carbon beads complex, and DCAQ. Yellow arrows indicate characteristic peaks for DCAQ, and green arrows indicate characteristic peaks for carbon.

### Thermogravimetry (TG)

Thermogravimetric analysis was conducted to confirm the amount of quinone in the quinone/carbon complex. The weight loss curves for activated carbon beads, DCAQ/activated carbon beads complex, and DCAQ at elevated temperature are shown in Figure S3. Samples were analyzed in  $\text{Al}_2\text{O}_3$  pans with Ar flow.

DCAQ sample showed almost complete evaporation around 370°C. On the other hand, in the case of complex with carbon, the evaporation temperature of DCAQ increased. This will be due to the stabilization effect of DCAQ in nanopore of activated carbon. The activated carbon beads showed a slight mass loss due to the decomposition of surface functional groups at high temperature. The mass loading of DCAQ in the complex, which was determined from the difference between the remaining mass percent of the activated carbon beads and the complex at 1000°C, was 28.8 wt%. This value was comparable to the mixing weight ratio of carbon beads to DCAQ, 7:3, in the preparation of complex.

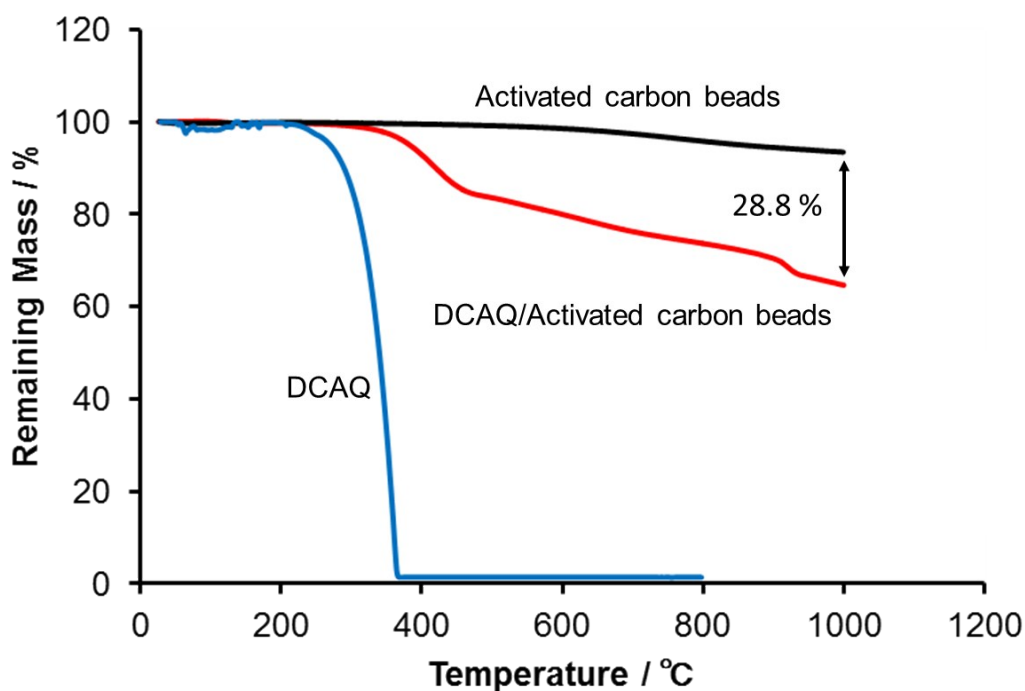

Figure S3 Weight loss curves for activated carbon beads, DCAQ/activated carbon beads complex, and DCAQ at elevated temperature with Ar flow.

### XRD patterns

The XRD patterns for the pristine activated carbon beads, DCAQ, and the DCAQ/carbon complex are shown in Figure S4. These patterns were obtained using powder X-ray diffraction (XRD; Bruker AXS D8 Advance, 40 kV and 30 mA) with CuK $\alpha$  radiation ( $\lambda = 1.5406 \text{ \AA}$ ).

In contrast to the XRD peaks observed in DCAQ powder, the XRD pattern for the DCAQ/carbon complex exhibited no characteristic peaks. However, by Raman spectroscopy and thermogravimetry, it was confirmed that this complex contained DCAQ at  $\sim 30 \text{ wt\%}$ . Therefore, this XRD result suggested that in this complex, DCAQ was held inside the nanoporous carbon beads with a less-crystalline or nanocrystalline structure. As shown in our previous study [21], holding the organic materials in nanoporous carbon with less-crystalline or nanocrystalline structures is preferable, because such adsorption state of the organic compounds in a conductive carbon material contributes to the electrochemical utilization of insulating organic compounds.

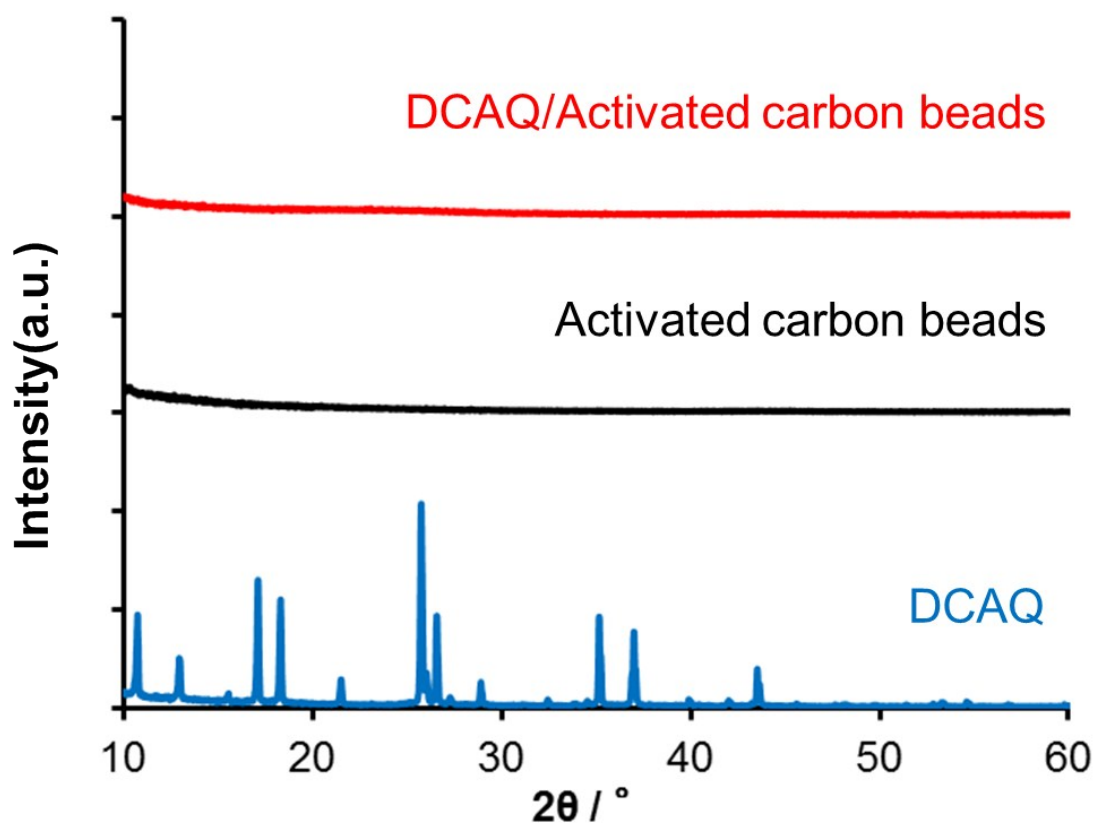

Figure S4 XRD patterns for activated carbon beads, DCAQ/activated carbon beads complex, and DCAQ.

### Cyclic voltammogram

For the cyclic voltammogram measurements as the single electrode characteristics, we employed carbon slurry electrolytes consisting of nanoporous activated carbon (Maxsorb® MSC-30, Kansai Coke and Chemicals Co., Ltd.), conductive carbon particle (DENKA BLACK®FX-35), and 0.5 M H<sub>2</sub>SO<sub>4</sub> and 0.05 M HCl aqueous solution as a counter electrode. The weight ratio of nanoporous carbon to conductive carbon was fixed to be 9:1. The weight ratio of the dispersed carbon materials to aqueous solution was fixed to be 15:85, and the total weight of counter electrode was greater than five times that of the working electrode to suppress the potential change of the counter electrode during charge/discharge processes. Ag/AgCl electrode was employed as the reference electrode. We initiated cyclic voltammetry measurements using a flow-cell module under ambient conditions at a scan rate of 1 mV/s.

The cyclic voltammograms for the TCHQ/carbon slurry as the positive electrolyte and the DCAQ/carbon slurry as the negative electrolyte are shown in Figure S5. The current density was calculated based on the weight of the quinone derivatives in working slurry electrolytes. The anodic and cathodic peak potentials for the TCHQ/carbon slurry were 0.46 and 0.41 V vs. Ag/AgCl, respectively. Therefore, the redox potential of the proton insertion/extraction reaction for TCHQ was estimated as the averaged value of the potentials, 0.44 V.

On the other hand, the anodic and cathodic peak potentials for the DCAQ/carbon slurry were -0.10 and -0.14 V (vs. Ag/AgCl), respectively. Thus, the redox potential of the proton insertion/extraction reaction for DCAQ was estimated to be -0.12 V.

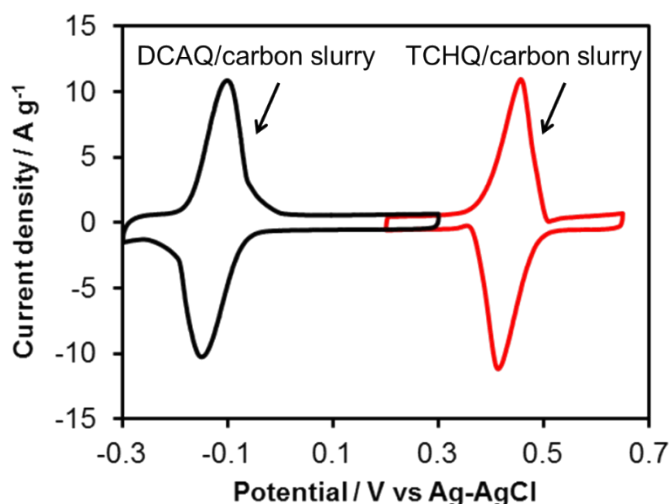

Figure S5 Cyclic voltammograms for the TCHQ/carbon slurry and the DCAQ/carbon slurry.

### Cycle life analysis

Figure S6(a) shows the rechargeable energy density for the couple of complex slurry electrolytes in a flow-cell module as a function of cycle number under static operation. These energy densities were

calculated based on the discharge potential profiles obtained at  $0.26 \text{ A g}^{-1}$  as shown in Figure S6(b). The decline in the energy density was  $\sim 25\%$  after 100 cycles.

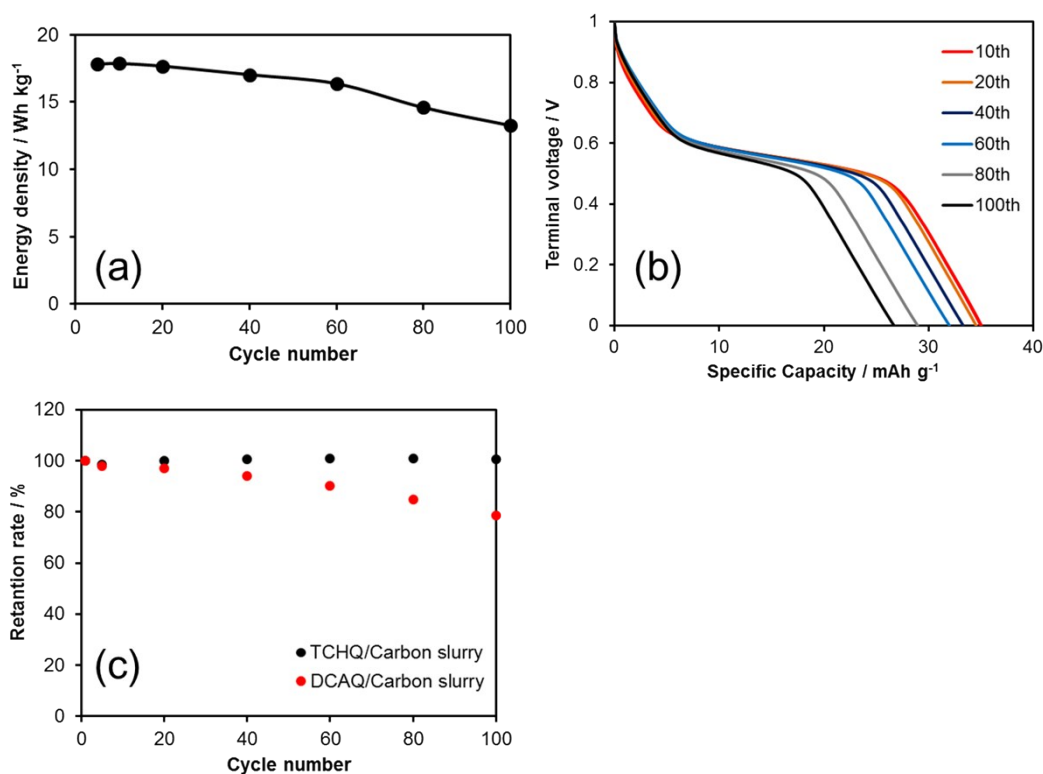

Figure S6 (a) Rechargeable energy density for the couple of complex slurry electrolytes in flow-cell module as a function of cycle, (b) discharge potential profiles obtained at each cycles at  $0.26 \text{ A g}^{-1}$ , and (c) retention rate of capacities in the each complex slurry electrolytes, measured by half-cell configuration.

Figure S6(c) shows the retention rate of capacities in the each complex slurry electrolytes, measured by half-cell configuration. The half-cell configuration is same as that employed in CV measurement, and the capacities for the DCAQ/carbon complex slurry and TCHQ/carbon complex slurry were measured in the range from  $-0.3$  to  $0.4 \text{ V}$  (vs.  $\text{Ag}/\text{AgCl}$ ) and from  $0.1$  to  $0.65 \text{ V}$  (vs.  $\text{Ag}/\text{AgCl}$ ), respectively. It was found that only the DCAQ/carbon complex slurry showed the decline in the capacitance during cycling and its decay behavior is quite similar to the decay of the energy density for the couple of complex slurry electrolytes under the full-cell operation shown in Figure S6(a). On the other hand, the TCHQ/carbon complex slurry didn't show the degradation after cycling. Therefore, the decline in the energy density for the couple of complex slurry electrolytes should be attributed to the degradation of the DCAQ/carbon complex slurry. Considering the case of TCHQ/carbon complex

slurry, the adequate choice of the organic redox-active material will suppress the decline in the energy density after cycling.



### Rate performance

The charge-discharge potential profiles for the slurry electrolytes with and without quinone derivatives at various current densities, which lead to Figure 5(b), are shown in Figure S7. The current density was calculated based on the weight of the solid components in the negative slurry electrolyte. The power densities calculated from the discharge profiles on the basis of the total weight of the solid components in the both slurry electrolytes are also noted.

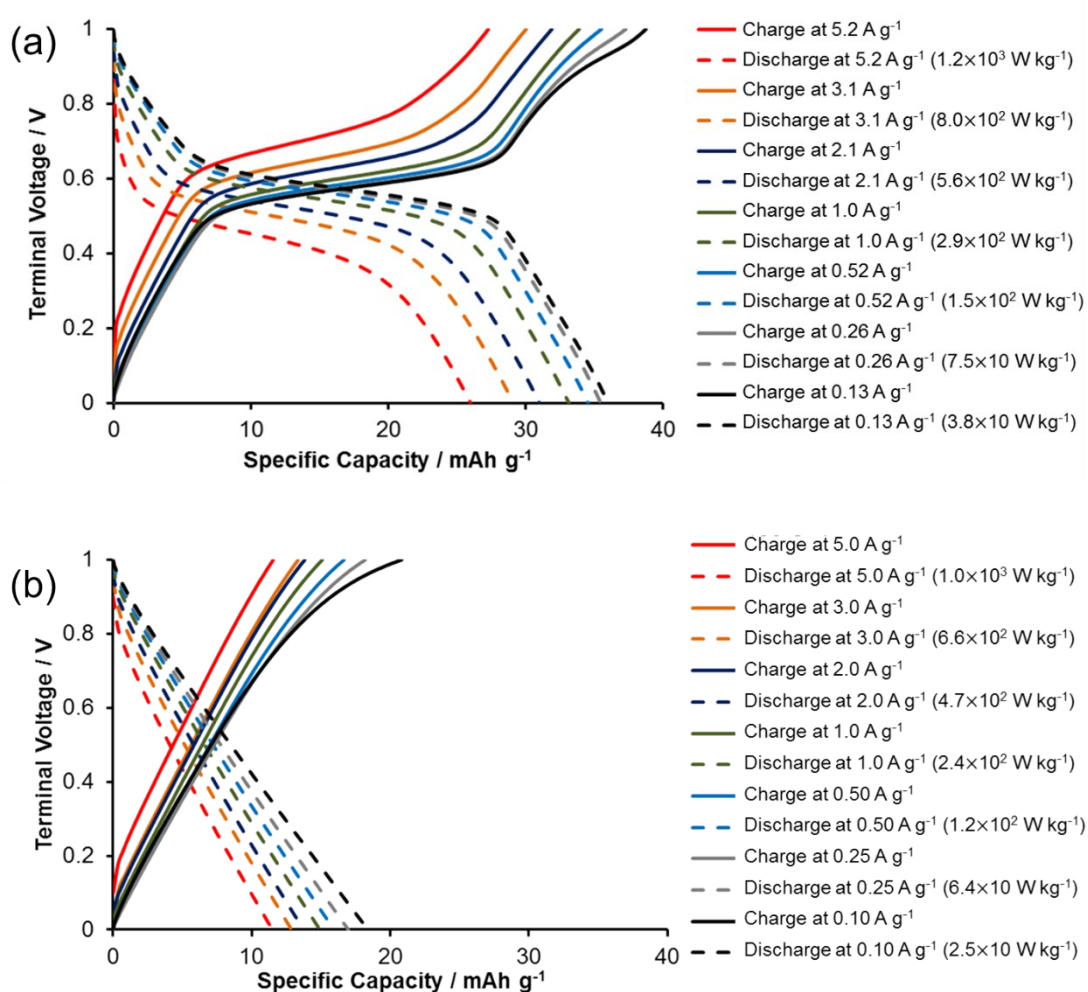

Figure S7 Charge-discharge potential profiles for the quinone/carbon complex slurry electrolytes (a) and carbon slurry electrolytes (b) at various current densities.

### Flow-cell module setup

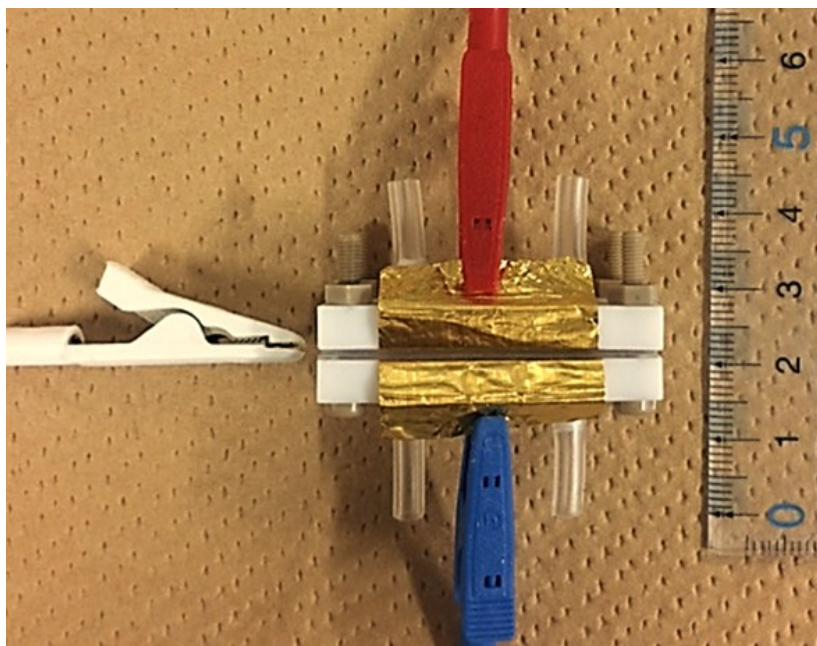

Figure S8 Photograph of flow cell module

The photograph of the flow cell module is shown in Figure S8. The reaction volume in flow cell module determined by the space in flow channel gaskets shown in Figure 6 (a), exposed area of current collector to the slurry in the channel, and the separator thickness are indicated in Table S1.

Table S1 Component size in flow-cell module

|                                                                                                          |                                                         |
|----------------------------------------------------------------------------------------------------------|---------------------------------------------------------|
| <b>Reaction volume in module</b>                                                                         | <b>16 mm<sup>3</sup></b><br><b>(LWH: 20×1.6×0.5 mm)</b> |
| Exposed area of current collector to the slurry<br>(electrode area)                                      | 32 mm <sup>2</sup><br>(LW: 20×1.6 mm)                   |
| Diameter of hole for slurry flow channel<br>in PTFE end plates                                           | 2.5 mm                                                  |
| Thickness of porous polymer membrane, separator<br>(polypropylene membrane, Celgard3501®, Polypore, USA) | 25 μm                                                   |

Ag/AgCl reference electrode was obtained by painting silver foil with 0.05mm of thickness by Ag/AgCl ink for reference electrode (ALS Co., Ltd.) and subsequent drying for one day. The prepared reference electrode was inserted between two porous polymer membranes.

### Self-discharge behavior

The behavior of the terminal voltage during self-discharge is shown in Figure S9. After charging to 1 V, the cell was kept under electrically-open-circuit condition for 30 min without flow operation. Subsequently, discharge operation was conducted. The current density for charge and discharge operation was  $0.26 \text{ A g}^{-1}$  on the basis of the weight of the solid components in the negative slurry electrolyte.

Under open-circuit condition, the cell exhibited a slight decrease in the terminal voltage for 30 min. From the charge and discharge capacities, it was found that 12% of stored charge was faded away by self-discharge for 30min.

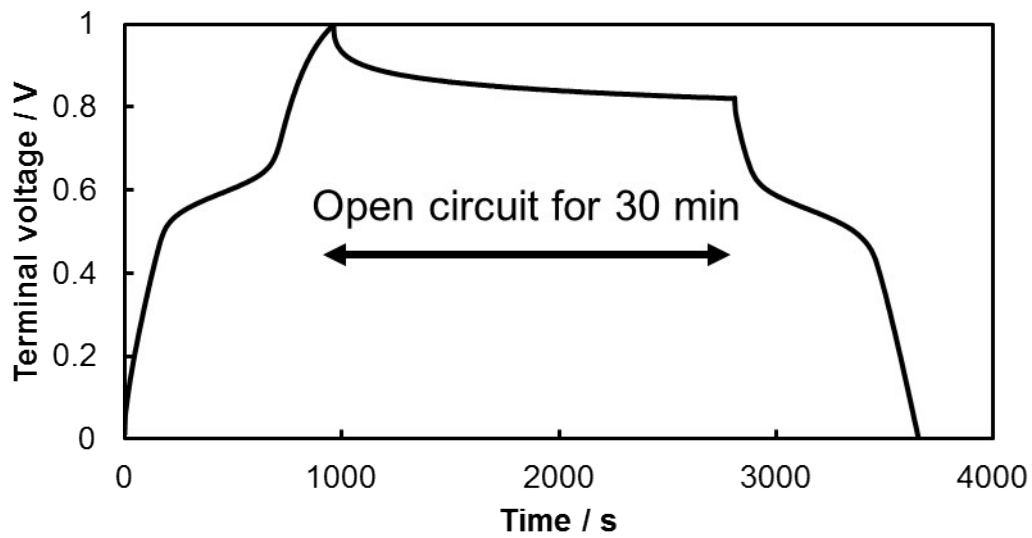

Figure S9 Self-discharge behavior of the cell between charge and discharge operation.

### Potential capacity of slurry electrolyte with solution-based electrolytes

In this estimation, we employed the value of ideal capacity and molecular weight of anthraquinone (257 mAh/g, 208 g/mol) as a basic redox-active quinone derivative. In the case of slurry electrolyte, the capacity of nanoporous carbon was estimated to be 30 mAh/g. Figure S10 shows ideal capacities of quinone-solution electrolyte, which was employed in quinone redox flow battery, and quinone/carbon complex slurry electrolytes proposed in this study. We estimated the ideal capacities for two types of slurry electrolytes, in which the ratio carbon to aqueous solution were fixed to be 15:85 and 10:90 (this study), respectively.

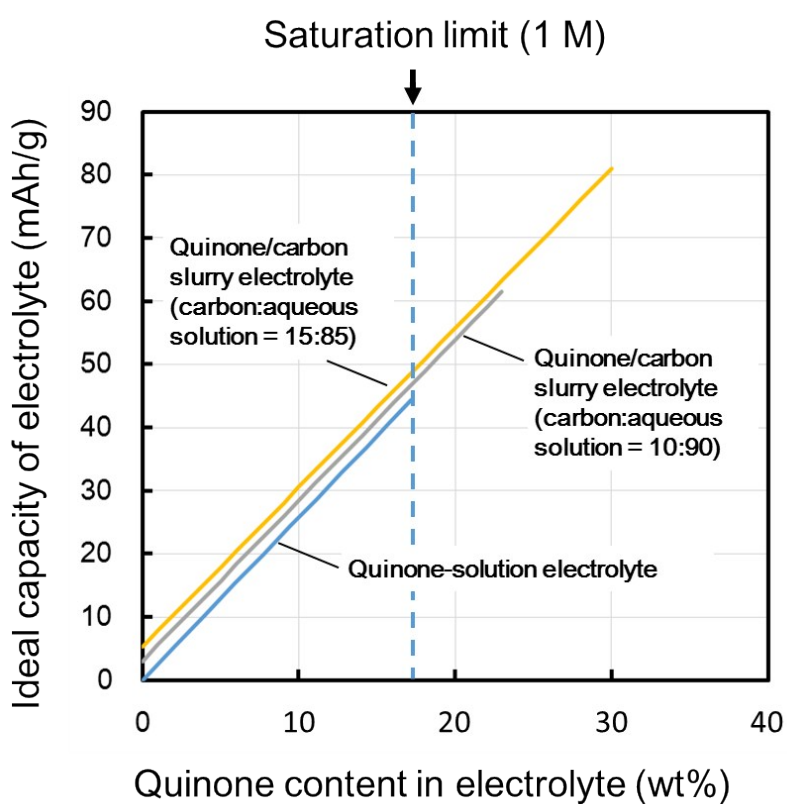

Figure S10 Ideal capacity of electrolytes as a function of quinone contents in electrolytes

The upper termination of quinone-solution electrolyte was determined by the general saturation solubility of quinone derivative ( $\sim 1$  M), whereas those of the slurry electrolytes was determined by the condition, which the solid-state anthraquinone (1.31 g/cc) completely fills the pores of nanoporous carbon (2.23 cc/g). As a result, it was indicated that the potential capacity of the slurry electrolytes with solid-state quinone exceed that of the quinone-solution electrolytes.
